# Supplementary material
Source: HighWire-hosted journal article supplement (https://erj.ersjournals.com/content/51/2/1701953)
Supplement: inline-supplementary-material-1 [file inline-supplementary-material-1.pdf]

Table S1 - Multivariate Cox regression analysis of factors associated with survival after categorization

| Variable                                                                 | Hazard ratio for death | 95% confidence interval | p value |
|--------------------------------------------------------------------------|------------------------|-------------------------|---------|
| <b>Groups</b>                                                            |                        |                         |         |
| No <i>P. aeruginosa</i> chronic infection with <2 exacerbations per year | 1.00                   | reference               | n/a     |
| No <i>P. aeruginosa</i> chronic infection with ≥2 exacerbations per year | 1.74                   | 1.28 – 2.38             | <0.001  |
| <i>P. aeruginosa</i> chronic infection with <2 exacerbations per year    | 0.90                   | 0.39 – 2.12             | 0.81    |
| <i>P. aeruginosa</i> chronic infection with ≥2 exacerbations per year    | 2.03                   | 1.36 – 3.03             | 0.001   |
| Age (years)                                                              | 1.05                   | 1.04 - 1.07             | <0.001  |
| Gender (male vs female)                                                  | 1.29                   | 1.00 – 1.68             | 0.055   |
| Radiology score (Reiff Score)                                            | 1.03                   | 0.99 – 1.06             | 0.11    |
| BMI < 18.5 Kg/m <sup>2</sup>                                             | 1.68                   | 1.13 – 2.50             | 0.011   |
| Smoking status                                                           | 1.11                   | 0.84 – 1.47             | 0.45    |
| MRC dyspnea score                                                        | 1.24                   | 1.16 – 1.45             | <0.001  |
| <b>GOLD FEV1</b>                                                         |                        |                         |         |
| GOLD 1                                                                   | 0.66                   | 0.44 – 1.00             | 0.048   |
| GOLD 2                                                                   | 0.41                   | 0.27 – 0.62             | <0.001  |
| GOLD 3                                                                   | 0.43                   | 0.27 – 0.68             | <0.001  |
| GOLD 4                                                                   | 1.00                   | Reference               | n/a     |
| <i>H. influenzae</i> chronic infection                                   | 0.57                   | 0.39 – 0.84             | 0.005   |
| <i>S. aureus</i> chronic infection                                       | 1.73                   | 1.10 – 2.60             | 0.01    |
| <i>M. catarrhalis</i> chronic infection                                  | 0.78                   | 0.43 – 1.44             | 0.43    |
| Enterobacteriaceae chronic infection                                     | 0.78                   | 0.49 – 1.24             | 0.29    |
| COPD                                                                     | 1.33                   | 0.98 – 1.81             | 0.07    |
| Diabetes                                                                 | 1.28                   | 0.93 – 1.75             | 0.13    |
| Chronic renal failure                                                    | 1.58                   | 1.13 – 2.23             | 0.008   |
| Ischemic heart disease                                                   | 1.46                   | 1.11 - 1.92             | 0.007   |
| Oral long term antibiotic suppressive therapy                            | 1.14                   | 0.86 – 1.49             | 0.36    |
| Nebulized long term antibiotic suppressive therapy                       | 0.79                   | 0.51 – 1.25             | 0.32    |
